# Supplementary material for: Pressure induced emission enhancement (PIEE) in solid-state 2,3,4,5-tetraphenylthiophene: a QM/MM study
Source: Royal Society of Chemistry journal article supplement (doi:10.1039/d4ra06387b), 2024-01-01
Supplement: d4ra06387b1.pdf [file d4ra06387b1.pdf]

## **Pressure induced emission enhancement (PIEE) in solid-state 2,3,4,5-Tetraphenylthiophene: a QM/MM study**

Yarong Gu<sup>\*a</sup>

---

*Department of Electronics, Xinzhou Normal University, Xinzhou, 034000, People's Republic of China. E-mail: guyr1990@163.com*

Table S 1 Geometry parameters of S<sub>0</sub> states for TPT in solid phase. Dihedral angles ( $\theta_1$ ,  $\theta_2$ ,  $\theta_3$ , and  $\theta_4$ ) are shown in Fig. 1

| <b>Pressure/GP<br/>a</b> | <b><math>\theta_1</math></b> | <b><math>\theta_2</math></b> | <b><math>\theta_3</math></b> | <b><math>\theta_4</math></b> |
|--------------------------|------------------------------|------------------------------|------------------------------|------------------------------|
| <b>0</b>                 | 146.07                       | 113.19                       | 66.84                        | 38.21                        |
| <b>0.93</b>              | 146.56                       | 114.24                       | 66.71                        | 37.72                        |
| <b>2.12</b>              | 146.91                       | 115.29                       | 66.07                        | 36.23                        |
| <b>3.41</b>              | 146.81                       | 116.29                       | 66.49                        | 35.14                        |
| <b>5.06</b>              | 146.71                       | 117.93                       | 66.56                        | 32.23                        |
| <b>6.63</b>              | 146.73                       | 119.50                       | 66.74                        | 30.26                        |
| <b>7.46</b>              | 145.89                       | 119.65                       | 67.16                        | 28.87                        |
| <b>8.5</b>               | 146.81                       | 121.30                       | 67.17                        | 28.04                        |

Table S 2 Geometry parameters of S<sub>1</sub> states for TPT in solid phase. Dihedral angles ( $\theta_1$ ,  $\theta_2$ ,  $\theta_3$ , and  $\theta_4$ ) are shown in Fig. 1.

| <b>Pressure/GPa</b> | <b><math>\theta_1</math></b> | <b><math>\theta_2</math></b> | <b><math>\theta_3</math></b> | <b><math>\theta_4</math></b> |
|---------------------|------------------------------|------------------------------|------------------------------|------------------------------|
| <b>0</b>            | 158.93                       | 122.18                       | 58.30                        | 24.08                        |
| <b>0.93</b>         | 158.44                       | 123.06                       | 58.53                        | 24.76                        |
| <b>2.12</b>         | 158.53                       | 123.81                       | 58.05                        | 23.82                        |
| <b>3.41</b>         | 158.62                       | 124.64                       | 58.55                        | 22.84                        |
| <b>5.06</b>         | 158.97                       | 125.61                       | 58.79                        | 20.39                        |
| <b>6.63</b>         | 159.56                       | 126.88                       | 58.89                        | 18.49                        |
| <b>7.46</b>         | 159.72                       | 126.79                       | 59.08                        | 17.19                        |
| <b>8.5</b>          | 161.72                       | 128.37                       | 58.85                        | 16.07                        |

Table S 3 Energy levels of HOMO, LUMO, the corresponding energy gaps ( $\Delta E_{gap}$ ) and  $S_1$  energy level of TPT in solid state at different pressures.

| Pressure/GPa | HOMO/eV  | LUMO/eV  | $\Delta E_{gap}$ /eV | $S_1$ /eV |
|--------------|----------|----------|----------------------|-----------|
| <b>0</b>     | -5.41289 | -1.23458 | 4.17831              | 3.0649    |
| <b>0.93</b>  | -5.38241 | -1.23023 | 4.15218              | 3.0572    |
| <b>2.12</b>  | -5.36282 | -1.22995 | 4.13286              | 3.0516    |
| <b>3.41</b>  | -5.34214 | -1.22669 | 4.11545              | 3.0456    |
| <b>5.06</b>  | -5.29316 | -1.22832 | 4.06484              | 2.9962    |
| <b>6.63</b>  | -5.26622 | -1.23376 | 4.03245              | 2.9667    |
| <b>7.46</b>  | -5.22976 | -1.22125 | 4.00851              | 2.9308    |
| <b>8.50</b>  | -5.21316 | -1.22533 | 3.98783              | 2.8977    |

Table S 4 The calculated  $k_r$ ,  $k_{ic}$  and  $\Phi_F$  at different pressure.

| Pressure/GP                   | <b>0</b> | <b>0.93</b> | <b>2.12</b> | <b>3.41</b> | <b>5.06</b> | <b>6.63</b> | <b>7.46</b> | <b>8.50</b> |
|-------------------------------|----------|-------------|-------------|-------------|-------------|-------------|-------------|-------------|
| <b>a</b>                      |          |             |             |             |             |             |             |             |
| $k_r(10^8 \text{ s}^{-1})$    | 2.384    | 2.348       | 2.350       | 2.386       | 2.260       | 2.169       | 2.111       | 2.100       |
| $k_{ic}(10^8 \text{ s}^{-1})$ | 5.803    | 2.242       | 2.060       | 2.488       | 2.979       | 3.208       | 5.224       | 7.884       |
| $\Phi_F(\%)$                  | 29.11    | 51.16       | 53.29       | 48.96       | 43.14       | 40.34       | 28.78       | 21.64       |

Table S 5 Adiabatic excitation energy ( $\nu_{fi}$ ) and the oscillator strength ( $f$ ) at different pressure.

| Pressure/GP            | <b>0</b> | <b>0.93</b> | <b>2.12</b> | <b>3.41</b> | <b>5.06</b> | <b>6.63</b> | <b>7.46</b> | <b>8.50</b> |
|------------------------|----------|-------------|-------------|-------------|-------------|-------------|-------------|-------------|
| <b>a</b>               |          |             |             |             |             |             |             |             |
| $\nu_{fi}/\text{a.u.}$ | 0.1260   | 0.1262      | 0.1262      | 0.1261      | 0.1252      | 0.1243      | 0.1237      | 0.1234      |
| $f$                    | 0.5887   | 0.5882      | 0.5815      | 0.5754      | 0.5489      | 0.5332      | 0.5100      | 0.5025      |

Table S 6 Contributions of low-frequency modes ( $\lambda_{LF}$ ) and high frequency modes ( $\lambda_{HF}$ ) to the total  $\lambda_e$  for TPT in solid state at different pressures.

| Pressure/GPa             | <b>0</b> | <b>0.93</b> | <b>2.12</b> | <b>3.41</b> | <b>5.06</b> | <b>6.63</b> | <b>7.46</b> | <b>8.50</b> |
|--------------------------|----------|-------------|-------------|-------------|-------------|-------------|-------------|-------------|
| $\lambda_{LF}/\lambda_e$ | 0.50     | 0.51        | 0.52        | 0.54        | 0.60        | 0.63        | 0.69        | 0.72        |
| $\lambda_{HF}/\lambda_e$ | 0.50     | 0.49        | 0.48        | 0.47        | 0.48        | 0.48        | 0.46        | 0.44        |

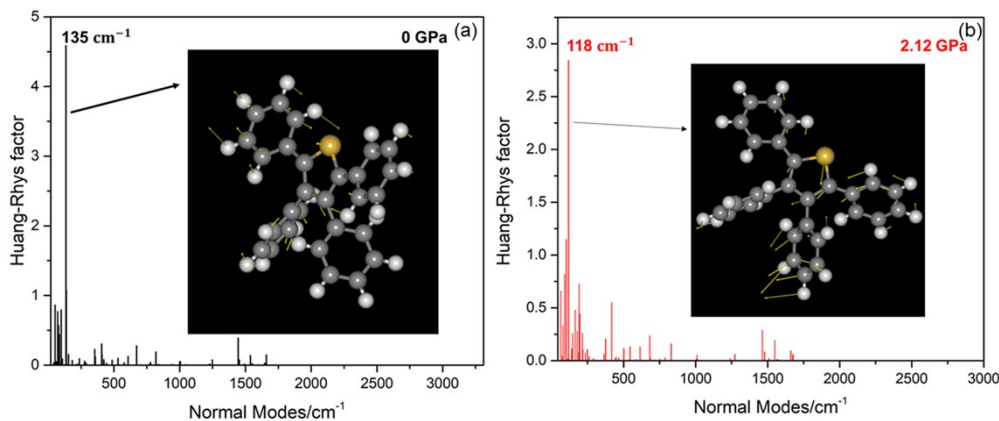

Fig. S 1 Calculated HR factors versus the normal mode frequencies at 0 GPa (a) and 2.12 GPa(b). Representative vibration modes are shown in the insets.

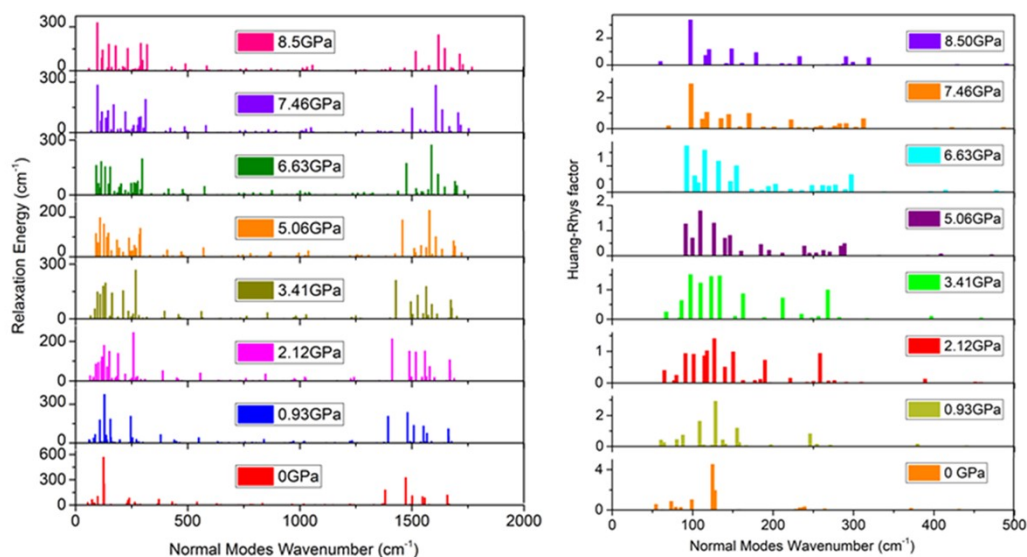

Fig. S 2 Calculated Huang-Rhys factor  $HR_k$  (right) and reorganization energies  $\lambda_{j,g}$  (left) versus the normal mode frequencies for TPT molecules in solid state at different pressure.

Table S7 Reorganization energy  $\lambda_e$  contributions (meV) from the bond lengths, bond angles, and dihedral angles for TPT in the solid phase at different pressure.

| Pressure/GPa | Bond length | Bond angle | Dihedral angle | Total  |
|--------------|-------------|------------|----------------|--------|
| 0            | 235.03      | 7.56       | 150.89         | 384.48 |
| 0.93         | 220.92      | 2.81       | 150.18         | 373.91 |
| 2.12         | 215.26      | 2.55       | 156.00         | 373.81 |
| 3.41         | 211.07      | 7.70       | 162.34         | 381.11 |
| 5.06         | 203.50      | 18.10      | 157.04         | 378.64 |
| 6.63         | 199.60      | 23.56      | 159.99         | 383.15 |
| 7.46         | 195.63      | 36.11      | 176.47         | 408.21 |
| 8.50         | 194.53      | 50.30      | 205.92         | 450.75 |
